# Supplementary material for: Investigating the Effects of Amino Acid Variations in Human Menin
Source: MDPI journal article supplement (doi:10.3390/molecules27051747), 2022-03-07
Supplement: s1 [file s1]

**Supplementary Table S2**

Analysis of the ten models of human menin obtained with Modeller, in terms of Z-score, QMEAN, RMSD with templates, and Ramachandran plot parameters.

| Models   | PROSAweb<br>Z-score | QMEANDisCo | RMSD<br>(3U84) | RMSD<br>(4GQ4) | RAMACHANDRAN PLOT ANALYSIS (%) |         |                       |                                                      |
|----------|---------------------|------------|----------------|----------------|--------------------------------|---------|-----------------------|------------------------------------------------------|
|          |                     |            |                |                | core                           | allowed | generously<br>allowed | disallowed                                           |
| Model 1  | -9.64               | 0.64       | 0.427          | 0.368          | 92.9                           | 6.0     | 0.8                   | 0.4 (Val153;Gln405)                                  |
| Model 2  | -9.51               | 0.61       | 0.637          | 0.378          | 89.8                           | 7.7     | 1.7                   | 0.8 (Leu13; Asn379; Ala528; Gln589)                  |
| Model 3  | -9.76               | 0.62       | 0.640          | 0.625          | 90.0                           | 8.7     | 1.0                   | 0.4 (Ser151; Glu482)                                 |
| Model 4  | -9.72               | 0.64       | 0.547          | 0.685          | 91.1                           | 7.3     | 0.4                   | 1.2 (Phe134; Glu209; Gln298; Gln403; Gln405; Glu535) |
| Model 5  | -9.51               | 0.65       | 0.496          | 0.254          | 93.1                           | 6.0     | 0.4                   | 0.6 (Glu479; Arg485;Arg532)                          |
| Model 6  | -9.84               | 0.63       | 0.602          | 0.338          | 89.0                           | 9.3     | 1.4                   | 0.4 (Gln473; Glu552)                                 |
| Model 7  | -9.97               | 0.64       | 0.556          | 0.306          | 91.5                           | 6.2     | 1.4                   | 1.0 (Phe134; Asn194; Val527; Gln589; Lys596)         |
| Model 8  | -10.09              | 0.66       | 0.563          | 0.531          | 91.9                           | 5.9     | 0.6                   | 0.6 (Ala68; Ser538; Gln589)                          |
| Model 9  | -9.71               | 0.63       | 0.485          | 0.375          | 89.8                           | 8.7     | 1.0                   | 0.6 (Glu209; Glu491; Gln589)                         |
| Model 10 | -9.39               | 0.65       | 0.629          | 0.295          | 91.1                           | 7.1     | 1.0                   | 0.8 (Lys135; Glu209; Val527; Gln589)                 |
