# Supplementary material for: Investigating the Effects of Amino Acid Variations in Human Menin
Source: MDPI journal article supplement (doi:10.3390/molecules27051747), 2022-03-07
Supplement: s1 [file s1]

**Supplementary Table S3. Summary of the effects**

| Residue | Exon | Codon   | Amino Acid | Secondary Structure | Solvent Accessibility | Predicted Stability | Intrachain Interactions | H-bonds      | Salt Bridges |
|---------|------|---------|------------|---------------------|-----------------------|---------------------|-------------------------|--------------|--------------|
| 12      | 1    | CCG→CTG | PRO→LEU    | Affected            | Not Affected          | More Stable         | Affected                | Affected     | Not Affected |
| 22      | 1    | CTG→CGG | LEU→ARG    | Not Affected        | Not Affected          | Less Stable         | Not Affected            | Not Affected | Not Affected |
| 22      | 1    | CTG→CCG | LEU→PRO    | Not Affected        | Not Affected          | Less Stable         | Affected                | Affected     | Not Affected |
| 26      | 1    | GAG→AAG | GLU→LYS    | Not Affected        | Not Affected          | Less Stable         | Affected                | Affected     | Not Affected |
| 27      | 1    | CTG→CCG | LEU→PRO    | Not Affected        | Not Affected          | Less Stable         | Affected                | Affected     | Not Affected |
| 37      | 2    | CTT→CCT | LEU→PRO    | Not Affected        | Not Affected          | Less Stable         | Affected                | Affected     | Not Affected |
| 38      | 2    | TCC→TTC | SER→PHE    | Not Affected        | Not Affected          | Less Stable         | Affected                | Affected     | Not Affected |
| 38      | 2    | TCC→CCC | SER→PRO    | Not Affected        | Not Affected          | Less Stable         | Affected                | Affected     | Not Affected |
| 39      | 2    | TTG→TGG | LEU→TRP    | Not Affected        | Not Affected          | Less Stable         | Not Affected            | Not Affected | Not Affected |
| 42      | 2    | GGC→GTC | GLY→VAL    | Not Affected        | Not Affected          | More Stable         | Not Affected            | Not Affected | Not Affected |
| 42      | 2    | GGC→GAC | GLY→ASP    | Not Affected        | Not Affected          | Uncertain           | Affected                | Affected     | Not Affected |
| 42      | 2    | GGC→AGC | GLY→SER    | Not Affected        | Not Affected          | Less Stable         | Affected                | Affected     | Not Affected |
| 42      | 2    | GGC→GCC | GLY→ALA    | Not Affected        | Not Affected          | Uncertain           | Not Affected            | Not Affected | Not Affected |
| 45      | 2    | GAG→GTG | GLU→VAL    | Not Affected        | Not Affected          | Less Stable         | Affected                | Affected     | Not Affected |
| 45      | 2    | GAG→GAC | GLU→ASP    | Not Affected        | Not Affected          | Less Stable         | Affected                | Affected     | Not Affected |
| 45      | 2    | GAG→GGG | GLU→GLY    | Not Affected        | Affected              | Less Stable         | Affected                | Affected     | Not Affected |
| 45      | 2    | GAG→AAG | GLU→LYS    | Not Affected        | Not Affected          | Less Stable         | Affected                | Affected     | Not Affected |
| 45      | 2    | GAG→GCG | GLU→ALA    | Not Affected        | Not Affected          | Less Stable         | Affected                | Affected     | Not Affected |
| 45      | 2    | GAG→CAG | GLU→GLN    | Not Affected        | Not Affected          | Less Stable         | Affected                | Affected     | Not Affected |
| 49      | 2    | GCT→GTT | ALA→VAL    | Not Affected        | Not Affected          | Less Stable         | Not Affected            | Not Affected | Not Affected |
| 52      | 2    | CGC→GGC | ARG→GLY    | Not Affected        | Not Affected          | Less Stable         | Affected                | Affected     | Not Affected |
| 53      | 2    | GTC→ATC | VAL→ILE    | Not Affected        | Not Affected          | Uncertain           | Not Affected            | Not Affected | Not Affected |
| 57      | 2    | AAC→AAA | ASN→LYS    | Not Affected        | Not Affected          | Less Stable         | Not Affected            | Not Affected | Not Affected |
| 72      | 2    | CCT→CAT | PRO→HIS    | Not Affected        | Not Affected          | More Stable         | Affected                | Affected     | Not Affected |
| 86      | 2    | ATC→TTC | ILE→PHE    | Not Affected        | Not Affected          | Less Stable         | Not Affected            | Not Affected | Not Affected |
| 89      | 2    | CTC→CGC | LEU→ARG    | Not Affected        | Not Affected          | Less Stable         | Not Affected            | Not Affected | Not Affected |
| 98      | 2    | CGA→CTA | ARG→LEU    | Not Affected        | Not Affected          | More Stable         | Not Affected            | Not Affected | Not Affected |
| 110     | 2    | GGG→GAG | GLY→GLU    | Not Affected        | Not Affected          | Less Stable         | Not Affected            | Not Affected | Not Affected |

|     |   |         |         |              |              |             |              |              |              |
|-----|---|---------|---------|--------------|--------------|-------------|--------------|--------------|--------------|
| 116 | 2 | GAG→GGG | GLU→GLY | Not Affected | Not Affected | Less Stable | Not Affected | Not Affected | Not Affected |
| 126 | 2 | TGG→GGG | TRP→GLY | Not Affected | Not Affected | Less Stable | Affected     | Affected     | Not Affected |
| 137 | 2 | CGG→TGG | ARG→TRP | Not Affected | Not Affected | Uncertain   | Not Affected | Not Affected | Not Affected |
| 139 | 2 | CAC→TAC | HIS→TYR | Not Affected | Not Affected | More Stable | Affected     | Affected     | Not Affected |
| 139 | 2 | CAC→GAC | HIS→ASP | Not Affected | Not Affected | Less Stable | Affected     | Affected     | Not Affected |
| 139 | 2 | CAC→CGC | HIS→ARG | Not Affected | Affected     | Less Stable | Affected     | Affected     | Not Affected |
| 139 | 2 | CAC→AAC | HIS→ASN | Not Affected | Not Affected | Less Stable | Affected     | Affected     | Not Affected |
| 139 | 2 | CAC→CCC | HIS→PRO | Affected     | Not Affected | Less Stable | Affected     | Affected     | Not Affected |
| 141 | 2 | CAG→CGG | GLN→ARG | Not Affected | Not Affected | Uncertain   | Affected     | Affected     | Not Affected |
| 144 | 2 | TTC→TGC | PHE→CYS | Not Affected | Not Affected | Less Stable | Not Affected | Not Affected | Not Affected |
| 144 | 2 | TTC→GTC | PHE→VAL | Not Affected | Not Affected | Less Stable | Not Affected | Not Affected | Not Affected |
| 145 | 2 | AGC→AGG | SER→ARG | Not Affected | Not Affected | Uncertain   | Affected     | Affected     | Not Affected |
| 146 | 2 | TTC→TCC | PHE→SER | Not Affected | Affected     | Less Stable | Affected     | Affected     | Not Affected |
| 147 | 2 | ATC→TTC | ILE→PHE | Not Affected | Not Affected | Uncertain   | Not Affected | Not Affected | Not Affected |
| 148 | 2 | ACA→CCA | THR→PRO | Affected     | Not Affected | Less Stable | Affected     | Affected     | Not Affected |
| 157 | 2 | TTG→TGG | LEU→TRP | Not Affected | Not Affected | Less Stable | Not Affected | Not Affected | Not Affected |
| 158 | 2 | GAC→GTC | ASP→VAL | Not Affected | Not Affected | More Stable | Affected     | Affected     | Not Affected |
| 158 | 2 | GAC→TAC | ASP→TYR | Not Affected | Affected     | Uncertain   | Affected     | Affected     | Not Affected |
| 158 | 2 | GAC→GAG | ASP→GLU | Not Affected | Affected     | Less Stable | Affected     | Affected     | Not Affected |
| 159 | 2 | AGC→ATC | SER→ILE | Not Affected | Not Affected | More Stable | Affected     | Affected     | Not Affected |
| 160 | 2 | TCC→TTC | SER→PHE | Not Affected | Not Affected | More Stable | Not Affected | Not Affected | Not Affected |
| 161 | 2 | GGT→GAT | GLY→ASP | Not Affected | Not Affected | Less Stable | Affected     | Affected     | Not Affected |
| 161 | 2 | GGT→GTT | GLY→VAL | Not Affected | Not Affected | More Stable | Affected     | Affected     | Not Affected |
| 161 | 2 | GGT→CGT | GLY→ARG | Not Affected | Not Affected | Uncertain   | Affected     | Affected     | Not Affected |
| 161 | 2 | GGT→TGT | GLY→CYS | Not Affected | Not Affected | Less Stable | Affected     | Affected     | Not Affected |
| 161 | 2 | GGT→AGT | GLY→SER | Not Affected | Not Affected | Uncertain   | Affected     | Affected     | Not Affected |
| 163 | 2 | GCC→GAC | ALA→ASP | Not Affected | Not Affected | Less Stable | Affected     | Affected     | Not Affected |
| 164 | 2 | TTT→TGT | PHE→CYS | Not Affected | Affected     | Less Stable | Not Affected | Not Affected | Not Affected |
| 165 | 2 | GCT→ACT | ALA→THR | Not Affected | Not Affected | Less Stable | Not Affected | Not Affected | Not Affected |
| 165 | 2 | GCT→CCT | ALA→PRO | Not Affected | Not Affected | Less Stable | Affected     | Affected     | Not Affected |
| 167 | 2 | GTT→TTT | VAL→PHE | Not Affected | Not Affected | Less Stable | Not Affected | Not Affected | Not Affected |
| 168 | 2 | GGG→AGG | GLY→ARG | Not Affected | Not Affected | Less Stable | Affected     | Affected     | Not Affected |
| 169 | 2 | GCC→GAC | ALA→ASP | Not Affected | Not Affected | Less Stable | Affected     | Affected     | Not Affected |

|     |   |         |         |              |              |             |              |              |              |
|-----|---|---------|---------|--------------|--------------|-------------|--------------|--------------|--------------|
| 170 | 2 | TGC→CGC | CYS→ARG | Not Affected | Not Affected | Less Stable | Affected     | Affected     | Not Affected |
| 170 | 2 | TGC→TAC | CYS→TYR | Not Affected | Not Affected | Less Stable | Affected     | Affected     | Not Affected |
| 173 | 2 | CTG→CCG | LEU→PRO | Affected     | Not Affected | Less Stable | Affected     | Affected     | Not Affected |
| 176 | 2 | CGG→CAG | ARG→GLN | Not Affected | Not Affected | Less Stable | Not Affected | Not Affected | Not Affected |
| 176 | 2 | CGG→TGG | ARG→TRP | Not Affected | Not Affected | Uncertain   | Not Affected | Not Affected | Not Affected |
| 177 | 2 | GAT→GTT | ASP→VAL | Not Affected | Not Affected | Uncertain   | Affected     | Affected     | Not Affected |
| 177 | 2 | GAT→TAT | ASP→TYR | Not Affected | Affected     | Uncertain   | Affected     | Affected     | Not Affected |
| 180 | 2 | CTC→CGC | LEU→ARG | Not Affected | Not Affected | Less Stable | Not Affected | Not Affected | Not Affected |
| 181 | 2 | GCC→CCC | ALA→PRO | Not Affected | Not Affected | Less Stable | Affected     | Affected     | Not Affected |
| 181 | 2 | GCC→TCC | ALA→SER | Not Affected | Not Affected | Less Stable | Not Affected | Not Affected | Not Affected |
| 182 | 2 | CTG→CCG | LEU→PRO | Not Affected | Not Affected | Less Stable | Affected     | Affected     | Not Affected |
| 184 | 2 | GAG→AAG | GLU→LYS | Not Affected | Not Affected | Uncertain   | Affected     | Affected     | Not Affected |
| 184 | 2 | GAG→CAG | GLU→GLN | Not Affected | Not Affected | Less Stable | Affected     | Affected     | Not Affected |
| 185 | 2 | GAT→GCT | ASP→ALA | Not Affected | Not Affected | Less Stable | Not Affected | Not Affected | Not Affected |
| 186 | 3 | CAT→GAT | HIS→ASP | Not Affected | Not Affected | Less Stable | Affected     | Affected     | Not Affected |
| 186 | 3 | CAT→CGT | HIS→ARG | Not Affected | Not Affected | Uncertain   | Affected     | Affected     | Affected     |
| 188 | 3 | TGG→TGC | TRP→CYS | Not Affected | Not Affected | Less Stable | Not Affected | Not Affected | Not Affected |
| 188 | 3 | TGG→CGG | TRP→ARG | Not Affected | Not Affected | Less Stable | Affected     | Affected     | Not Affected |
| 188 | 3 | TGG→TCG | TRP→SER | Not Affected | Not Affected | Less Stable | Not Affected | Not Affected | Not Affected |
| 189 | 3 | GTA→GAA | VAL→GLU | Not Affected | Not Affected | Less Stable | Not Affected | Not Affected | Not Affected |
| 193 | 3 | CCC→CTC | PRO→LEU | Not Affected | Not Affected | Uncertain   | Not Affected | Not Affected | Not Affected |
| 194 | 3 | AAT→AGT | ASN→SER | Not Affected | Not Affected | More Stable | Not Affected | Not Affected | Not Affected |
| 197 | 3 | CAG→AAG | GLN→LYS | Not Affected | Not Affected | Uncertain   | Affected     | Affected     | Not Affected |
| 198 | 3 | ACA→ATA | THR→ILE | Not Affected | Not Affected | More Stable | Affected     | Affected     | Not Affected |
| 200 | 3 | GAG→GGG | GLU→GLY | Not Affected | Affected     | Less Stable | Affected     | Affected     | Not Affected |
| 201 | 3 | GTC→GGC | VAL→GLY | Not Affected | Not Affected | Less Stable | Not Affected | Not Affected | Not Affected |
| 202 | 3 | ACC→ATC | THR→ILE | Not Affected | Not Affected | Less Stable | Affected     | Affected     | Not Affected |
| 204 | 3 | CAC→GAC | HIS→ASP | Not Affected | Affected     | Less Stable | Not Affected | Not Affected | Not Affected |
| 220 | 3 | GTG→ATG | VAL→MET | Not Affected | Affected     | Uncertain   | Not Affected | Not Affected | Not Affected |
| 225 | 3 | TGG→CGG | TRP→ARG | Not Affected | Not Affected | Less Stable | Affected     | Affected     | Not Affected |
| 225 | 3 | TGG→TGC | TRP→SER | Not Affected | Affected     | Less Stable | Affected     | Affected     | Not Affected |
| 225 | 3 | TGG→TTG | TRP→LEU | Not Affected | Not Affected | Less Stable | Affected     | Affected     | Not Affected |
| 228 | 3 | CTG→CCG | LEU→PRO | Not Affected | Not Affected | Less Stable | Affected     | Affected     | Not Affected |

|     |   |         |         |              |              |             |              |              |              |
|-----|---|---------|---------|--------------|--------------|-------------|--------------|--------------|--------------|
| 230 | 3 | GGA→AGA | GLY→ARG | Not Affected | Affected     | Uncertain   | Not Affected | Not Affected | Not Affected |
| 231 | 3 | TCA→CCA | SER→PRO | Not Affected | Not Affected | Less Stable | Affected     | Affected     | Not Affected |
| 234 | 3 | CGC→CAC | ARG→HIS | Not Affected | Not Affected | Less Stable | Affected     | Affected     | Not Affected |
| 234 | 3 | CGC→CTC | ARG→LEU | Not Affected | Not Affected | Less Stable | Affected     | Affected     | Not Affected |
| 236 | 3 | GAC→CAC | ASP→HIS | Not Affected | Not Affected | Less Stable | Affected     | Affected     | Not Affected |
| 240 | 3 | GAG→AAG | GLU→LYS | Not Affected | Not Affected | Less Stable | Affected     | Affected     | Not Affected |
| 246 | 3 | TGT→TAT | CYS→TYR | Not Affected | Not Affected | Less Stable | Not Affected | Not Affected | Not Affected |
| 246 | 3 | TGT→TTT | CYS→PHE | Not Affected | Not Affected | Less Stable | Not Affected | Not Affected | Not Affected |
| 246 | 3 | TGT→CGT | CYS→ARG | Not Affected | Not Affected | Less Stable | Affected     | Affected     | Not Affected |
| 247 | 3 | GCC→GTC | ALA→VAL | Not Affected | Not Affected | Less Stable | Not Affected | Not Affected | Not Affected |
| 252 | 3 | ATT→ACT | ILE→THR | Not Affected | Affected     | Less Stable | Not Affected | Not Affected | Not Affected |
| 254 | 3 | CTG→CCG | LEU→PRO | Not Affected | Not Affected | Uncertain   | Affected     | Affected     | Not Affected |
| 258 | 4 | TCG→TTG | SER→LEU | Not Affected | Affected     | Uncertain   | Affected     | Affected     | Not Affected |
| 258 | 4 | TCG→TGG | SER→TRP | Not Affected | Affected     | Uncertain   | Affected     | Affected     | Not Affected |
| 258 | 4 | TCG→CCG | SER→PRO | Not Affected | Not Affected | Less Stable | Affected     | Affected     | Not Affected |
| 260 | 4 | GAG→AAG | GLU→LYS | Not Affected | Not Affected | Uncertain   | Not Affected | Not Affected | Not Affected |
| 261 | 4 | CTT→TTT | LEU→PHE | Not Affected | Not Affected | Less Stable | Not Affected | Not Affected | Not Affected |
| 263 | 4 | CAG→CAC | GLN→HIS | Not Affected | Affected     | Uncertain   | Affected     | Affected     | Not Affected |
| 264 | 4 | CTG→CGG | LEU→ARG | Not Affected | Not Affected | Less Stable | Not Affected | Not Affected | Not Affected |
| 264 | 4 | CTG→CCG | LEU→PRO | Not Affected | Not Affected | Less Stable | Affected     | Affected     | Not Affected |
| 265 | 4 | CAG→CGG | GLN→ARG | Not Affected | Not Affected | Less Stable | Affected     | Affected     | Not Affected |
| 265 | 4 | CAG→CCG | GLN→PRO | Not Affected | Not Affected | Less Stable | Affected     | Affected     | Not Affected |
| 269 | 4 | CTC→CCC | LEU→PRO | Not Affected | Not Affected | Less Stable | Affected     | Affected     | Not Affected |
| 272 | 4 | CTC→CCC | LEU→PRO | Not Affected | Not Affected | Less Stable | Affected     | Affected     | Not Affected |
| 278 | 4 | CTG→CCG | LEU→PRO | Not Affected | Not Affected | Less Stable | Not Affected | Not Affected | Not Affected |
| 279 | 4 | GAA→GCA | GLU→ALA | Not Affected | Not Affected | Less Stable | Affected     | Affected     | Not Affected |
| 280 | 4 | AGG→AAG | ARG→LYS | Not Affected | Affected     | Less Stable | Not Affected | Not Affected | Not Affected |
| 282 | 4 | CCC→CAC | PRO→HIS | Not Affected | Not Affected | Less Stable | Not Affected | Not Affected | Not Affected |
| 282 | 4 | CCC→CTC | PRO→LEU | Not Affected | Not Affected | More Stable | Not Affected | Not Affected | Not Affected |
| 286 | 4 | GGG→AGG | GLY→ARG | Not Affected | Not Affected | Uncertain   | Not Affected | Not Affected | Not Affected |
| 289 | 4 | GCA→CCA | ALA→PRO | Not Affected | Not Affected | Less Stable | Affected     | Affected     | Not Affected |
| 289 | 4 | GCA→GTA | ALA→VAL | Not Affected | Not Affected | Less Stable | Not Affected | Not Affected | Not Affected |
| 289 | 4 | GCA→GAA | ALA→GLU | Not Affected | Not Affected | Less Stable | Not Affected | Not Affected | Not Affected |

|     |   |         |         |              |              |             |              |              |              |
|-----|---|---------|---------|--------------|--------------|-------------|--------------|--------------|--------------|
| 289 | 4 | GCA→CAA | ALA→GLN | Not Affected | Not Affected | Less Stable | Not Affected | Not Affected | Not Affected |
| 291 | 4 | CTA→CCA | LEU→PRO | Not Affected | Not Affected | Less Stable | Affected     | Affected     | Not Affected |
| 294 | 4 | CTG→CCG | LEU→PRO | Affected     | Not Affected | Less Stable | Affected     | Affected     | Not Affected |
| 310 | 5 | GGC→CGC | GLY→ARG | Not Affected | Not Affected | Uncertain   | Not Affected | Not Affected | Not Affected |
| 310 | 5 | GGC→GAC | GLY→ASP | Not Affected | Not Affected | Uncertain   | Not Affected | Not Affected | Not Affected |
| 314 | 6 | GCC→CCC | ALA→PRO | Not Affected | Not Affected | Less Stable | Affected     | Affected     | Not Affected |
| 316 | 6 | ACC→CCC | THR→PRO | Not Affected | Not Affected | Uncertain   | Affected     | Affected     | Not Affected |
| 319 | 6 | CGG→CCG | ARG→PRO | Not Affected | Not Affected | Less Stable | Not Affected | Not Affected | Not Affected |
| 320 | 6 | GAT→TAT | ASP→TYR | Not Affected | Affected     | More Stable | Affected     | Affected     | Not Affected |
| 322 | 6 | CAC→CGC | HIS→ARG | Not Affected | Not Affected | Less Stable | Affected     | Affected     | Not Affected |
| 322 | 6 | CAC→TAC | HIS→TYR | Not Affected | Not Affected | Less Stable | Affected     | Affected     | Not Affected |
| 325 | 6 | CCC→CGC | PRO→ARG | Not Affected | Not Affected | Uncertain   | Not Affected | Not Affected | Not Affected |
| 325 | 6 | CCC→CTC | PRO→LEU | Not Affected | Not Affected | More Stable | Not Affected | Not Affected | Not Affected |
| 330 | 6 | GCT→CCT | ALA→PRO | Not Affected | Not Affected | Less Stable | Affected     | Affected     | Not Affected |
| 335 | 6 | CGC→CCC | ARG→PRO | Not Affected | Not Affected | Less Stable | Affected     | Affected     | Affected     |
| 342 | 7 | GCC→GAC | ALA→ASP | Not Affected | Not Affected | Less Stable | Not Affected | Not Affected | Not Affected |
| 342 | 7 | GCC→CCC | ALA→PRO | Not Affected | Not Affected | Less Stable | Affected     | Affected     | Not Affected |
| 343 | 7 | CTG→CCG | LEU→PRO | Not Affected | Not Affected | Less Stable | Affected     | Affected     | Not Affected |
| 345 | 7 | GCC→TCC | ALA→THR | Not Affected | Not Affected | Less Stable | Affected     | Affected     | Not Affected |
| 347 | 7 | GCG→CCG | ALA→PRO | Not Affected | Not Affected | Less Stable | Affected     | Affected     | Not Affected |
| 349 | 7 | ACG→AGG | THR→ARG | Not Affected | Not Affected | Less Stable | Affected     | Affected     | Not Affected |
| 353 | 7 | ATC→AAC | ILE→ASN | Not Affected | Not Affected | Less Stable | Not Affected | Not Affected | Not Affected |
| 355 | 7 | GAC→GTC | ASP→VAL | Not Affected | Not Affected | Uncertain   | Affected     | Affected     | Not Affected |
| 356 | 7 | TAC→AAC | TYR→ASN | Not Affected | Not Affected | Less Stable | Affected     | Affected     | Not Affected |
| 358 | 7 | TAC→GAC | TYR→ASP | Not Affected | Not Affected | Less Stable | Not Affected | Not Affected | Not Affected |
| 359 | 7 | TGC→TTC | CYS→PHE | Not Affected | Not Affected | Less Stable | Affected     | Affected     | Not Affected |
| 360 | 7 | CGG→TGG | ARG→TRP | Not Affected | Not Affected | Uncertain   | Not Affected | Not Affected | Not Affected |
| 362 | 7 | GAC→CAC | ASP→HIS | Not Affected | Not Affected | Less Stable | Affected     | Affected     | Not Affected |
| 364 | 7 | GAG→AAG | GLU→LYS | Not Affected | Not Affected | Uncertain   | Affected     | Affected     | Not Affected |
| 369 | 7 | TTC→TGC | PHE→CYS | Not Affected | Not Affected | Less Stable | Affected     | Affected     | Not Affected |
| 371 | 7 | GAA→GAT | GLU→ASP | Not Affected | Not Affected | Less Stable | Not Affected | Not Affected | Not Affected |
| 373 | 7 | GCC→GAC | ALA→ASP | Not Affected | Not Affected | Less Stable | Not Affected | Not Affected | Not Affected |
| 373 | 7 | GCC→CCC | ALA→PRO | Not Affected | Not Affected | Less Stable | Affected     | Affected     | Not Affected |

|     |   |         |         |              |              |             |              |              |              |
|-----|---|---------|---------|--------------|--------------|-------------|--------------|--------------|--------------|
| 377 | 7 | ATC→ATG | ILE→MET | Not Affected | Not Affected | Less Stable | Not Affected | Not Affected | Not Affected |
| 378 | 7 | CCC→GCC | PRO→ALA | Not Affected | Affected     | Less Stable | Not Affected | Not Affected | Not Affected |
| 378 | 7 | CCC→CTC | PRO→LEU | Not Affected | Affected     | More Stable | Not Affected | Not Affected | Not Affected |
| 378 | 7 | CCC→TCC | PRO→SER | Not Affected | Affected     | Less Stable | Affected     | Affected     | Not Affected |
| 380 | 7 | CTG→CCG | LEU→PRO | Not Affected | Affected     | Less Stable | Affected     | Affected     | Not Affected |
| 381 | 7 | CTG→CCG | LEU→PRO | Not Affected | Not Affected | Less Stable | Affected     | Affected     | Not Affected |
| 390 | 8 | GCG→GTG | ALA→VAL | Not Affected | Not Affected | Uncertain   | Not Affected | Not Affected | Not Affected |
| 395 | 8 | CCG→CGG | PRO→ARG | Not Affected | Not Affected | More Stable | Not Affected | Not Affected | Not Affected |
| 415 | 8 | TTC→TTA | PHE→LEU | Not Affected | Not Affected | Less Stable | Not Affected | Not Affected | Not Affected |
| 416 | 8 | GCC→CCC | ALA→PRO | Not Affected | Not Affected | Less Stable | Affected     | Affected     | Not Affected |
| 418 | 8 | CTG→CGG | LEU→ARG | Not Affected | Not Affected | Less Stable | Not Affected | Not Affected | Not Affected |
| 418 | 8 | CTG→CCG | LEU→PRO | Not Affected | Not Affected | Less Stable | Affected     | Affected     | Not Affected |
| 419 | 8 | CTG→CCG | LEU→PRO | Not Affected | Not Affected | Less Stable | Affected     | Affected     | Not Affected |
| 419 | 8 | CTG→CAG | LEU→GLN | Not Affected | Not Affected | Less Stable | Not Affected | Not Affected | Not Affected |
| 420 | 8 | CGA→CCA | ARG→PRO | Not Affected | Not Affected | Less Stable | Affected     | Affected     | Not Affected |
| 423 | 8 | GAC→AAC | ASP→ASN | Not Affected | Not Affected | Less Stable | Affected     | Affected     | Not Affected |
| 423 | 8 | GAC→CAC | ASP→HIS | Not Affected | Not Affected | Less Stable | Affected     | Affected     | Not Affected |
| 424 | 8 | GGC→GTC | GLY→VAL | Not Affected | Not Affected | More Stable | Not Affected | Not Affected | Not Affected |
| 425 | 8 | ATC→AAC | ILE→ASN | Not Affected | Not Affected | Less Stable | Not Affected | Not Affected | Not Affected |
| 426 | 8 | TGC→TAC | CYS→TYR | Not Affected | Affected     | Less Stable | Affected     | Affected     | Not Affected |
| 428 | 8 | TGG→CGG | TRP→ARG | Not Affected | Not Affected | Less Stable | Not Affected | Not Affected | Not Affected |
| 428 | 8 | TGG→TCG | TRP→SER | Not Affected | Not Affected | Less Stable | Affected     | Affected     | Not Affected |
| 432 | 8 | AGT→AGA | SER→ARG | Not Affected | Not Affected | Less Stable | Affected     | Affected     | Not Affected |
| 432 | 8 | AGT→ATT | SER→ILE | Not Affected | Not Affected | Less Stable | Affected     | Affected     | Not Affected |
| 434 | 9 | ACG→AAG | THR→LYS | Not Affected | Not Affected | Uncertain   | Not Affected | Not Affected | Not Affected |
| 441 | 9 | TGG→TGT | TRP→CYS | Not Affected | Not Affected | Less Stable | Affected     | Affected     | Not Affected |
| 441 | 9 | TGG→TCG | TRP→SER | Not Affected | Not Affected | Less Stable | Affected     | Affected     | Not Affected |
| 448 | 9 | TCC→TAC | SER→TYR | Not Affected | Not Affected | Uncertain   | Affected     | Affected     | Not Affected |
| 449 | 9 | CTA→CCA | LEU→PRO | Not Affected | Not Affected | Less Stable | Affected     | Affected     | Not Affected |
| 452 | 9 | TTT→TCT | PHE→SER | Not Affected | Not Affected | Less Stable | Affected     | Affected     | Not Affected |
| 452 | 9 | TTT→CTT | PHE→LEU | Not Affected | Not Affected | Less Stable | Affected     | Affected     | Not Affected |
| 457 | 9 | CGG→TGG | ARG→TRP | Not Affected | Not Affected | Uncertain   | Affected     | Affected     | Not Affected |
| 476 | 9 | TGG→TGT | TRP→CYS | Not Affected | Not Affected | Uncertain   | Affected     | Affected     | Not Affected |

|     |    |         |         |              |              |             |              |              |              |
|-----|----|---------|---------|--------------|--------------|-------------|--------------|--------------|--------------|
| 507 | 10 | AAG→ATG | LYS→MET | Not Affected | Not Affected | Uncertain   | Not Affected | Not Affected | Not Affected |
| 508 | 10 | GGC→GAC | GLY→ASP | Not Affected | Not Affected | Uncertain   | Not Affected | Not Affected | Not Affected |
| 513 | 10 | CAG→AAG | GLN→LYS | Not Affected | Not Affected | Uncertain   | Not Affected | Not Affected | Not Affected |
| 521 | 10 | CGG→GGG | ARG→GLY | Not Affected | Not Affected | Less Stable | Not Affected | Not Affected | Not Affected |
| 537 | 10 | GGC→TGC | GLY→CYS | Not Affected | Not Affected | Uncertain   | Not Affected | Not Affected | Not Affected |
| 540 | 10 | GCT→GTT | ALA→VAL | Not Affected | Not Affected | Uncertain   | Not Affected | Not Affected | Not Affected |
| 545 | 10 | CCC→TCC | PRO→SER | Not Affected | Not Affected | Less Stable | Not Affected | Not Affected | Not Affected |
| 546 | 10 | ACA→GCA | THR→ALA | Not Affected | Not Affected | Uncertain   | Affected     | Affected     | Not Affected |
| 548 | 10 | TCA→TTA | SER→LEU | Not Affected | Not Affected | More Stable | Not Affected | Not Affected | Not Affected |
| 549 | 10 | CCA→TCA | PRO→SER | Not Affected | Not Affected | Less Stable | Affected     | Affected     | Not Affected |
| 555 | 10 | GTG→CTG | VAL→LEU | Not Affected | Not Affected | Uncertain   | Not Affected | Not Affected | Not Affected |
| 557 | 10 | ACT→TCT | THR→SER | Not Affected | Not Affected | Less Stable | Affected     | Affected     | Not Affected |
| 560 | 10 | AGT→AAT | SER→ASN | Not Affected | Not Affected | Less Stable | Affected     | Affected     | Not Affected |
| 562 | 10 | AAG→GAG | LYS→GLU | Not Affected | Not Affected | Less Stable | Affected     | Affected     | Affected     |
| 563 | 10 | ATG→AAG | MET→LYS | Not Affected | Not Affected | Less Stable | Affected     | Affected     | Not Affected |
| 566 | 10 | ATG→AGG | MET→ARG | Not Affected | Affected     | Less Stable | Affected     | Affected     | Not Affected |
| 566 | 10 | ATG→ACG | MET→THR | Not Affected | Not Affected | Less Stable | Affected     | Affected     | Not Affected |
| 566 | 10 | ATG→AAG | MET→LYS | Not Affected | Not Affected | Less Stable | Affected     | Affected     | Not Affected |
| 580 | 10 | ATC→AAC | ILE→ASN | Not Affected | Not Affected | Less Stable | Not Affected | Not Affected | Not Affected |
| 584 | 10 | CTC→CCC | LEU→PRO | Not Affected | Not Affected | Less Stable | Affected     | Affected     | Not Affected |
| 588 | 10 | TCG→CCG | SER→PRO | Not Affected | Not Affected | Less Stable | Not Affected | Not Affected | Not Affected |
