# Supplementary material for: Investigating the Effects of Amino Acid Variations in Human Menin
Source: MDPI journal article supplement (doi:10.3390/molecules27051747), 2022-03-07
Supplement: s1 [file s1]

## Supplementary Table S1

Stereochemical and structural features of the experimental structures of human menin, identified by PDB IDs 3U83 and 4GQ4.

| FEATURES          | 3U84                                                  | 4GQ4                                                  |
|-------------------|-------------------------------------------------------|-------------------------------------------------------|
| RESOLUTION (Å)    | 2.50                                                  | 1.27                                                  |
| R VALUE           | 0.198                                                 | 0.149                                                 |
| R FREE            | 0.236                                                 | 0.182                                                 |
| RAMACHANDRAN PLOT | 88.8% core, 11.0% allow.,<br>0.1% gener., 0.0% disall | 93.3% core, 6.2% allow.,<br>0.5% gener., 0.0% disall. |
| Z-SCORE           | -9.78 [chain A (506 aa)]                              | -9.62 [chain A (468 aa)]                              |
| MISSING RESIDUES  | YES                                                   | YES                                                   |
| DELETION          | YES (460-536)                                         | YES (54-73; 387-398; 460-536)                         |
