# Supplementary material for: Investigating the Effects of Amino Acid Variations in Human Menin
Source: MDPI journal article supplement (doi:10.3390/molecules27051747), 2022-03-07
Supplement: s1 [file s1]

# Supplementary Table S4. Predictions of the stability effect of mutations

Results from the predictions are reported, with the color code: red = less stable, blue = more stable, black = uncertain effect.

Consensus column reports the final prediction, used in the online database, with the same color code.

| MENIN                |          |          |                                          |                                                             |                                 |          |           |
|----------------------|----------|----------|------------------------------------------|-------------------------------------------------------------|---------------------------------|----------|-----------|
| MISSENSE<br>MUTATION | Position | Dynamut1 | INPS 3D ( $\Delta\Delta G$ )<br>kcal/mol | DUET- Predicted<br>Stability Change<br>( $\Delta\Delta G$ ) | MAESTROweb ( $\Delta\Delta G$ ) | Popmusic | CONSENSUS |
| P12L                 | 12       | 0.093    | -0.470                                   | 0.142                                                       | -0.247                          | 1.35     | 3/5       |
| L22P                 | 22       | -1.321   | -3.491                                   | -1.888                                                      | 0.357                           | 3.74     | 5/5       |
| L22R                 | 22       | -2.087   | -1.980                                   | -2.210                                                      | 0.038                           | 2.02     | 5/5       |
| E26K                 | 26       | 0.053    | -0.469                                   | -1.186                                                      | 0.076                           | 1.04     | 3/5       |
| L27P                 | 27       | -1.620   | -3.465                                   | -2.298                                                      | 0.329                           | 3.24     | 5/5       |
| L37P                 | 37       | -1.729   | -3.525                                   | -2.115                                                      | 0.700                           | 3.61     | 5/5       |
| S38F                 | 38       | -0.480   | -0.038                                   | -0.576                                                      | -0.383                          | 0.22     | 3/5       |
| S38P                 | 38       | -0.451   | -1.068                                   | -0.207                                                      | 0.000                           | 2.13     | 4/5       |
| L39W                 | 39       | -1.089   | -2.088                                   | -2.073                                                      | -0.121                          | 1.51     | 4/5       |
| G42A                 | 42       | 1.251    | -0.978                                   | -0.212                                                      | -0.215                          | 0.17     | uncertain |
| G42D                 | 42       | 1.086    | -0.998                                   | -2.306                                                      | -0.151                          | 0.84     | uncertain |
| G42S                 | 42       | 1.547    | -1.081                                   | -1.726                                                      | -0.241                          | 0.82     | 3/5       |
| G42V                 | 42       | 1.731    | -0.769                                   | 0.409                                                       | -0.337                          | 1.07     | 3/5       |
| E45A                 | 45       | -1.906   | -0.252                                   | -2.666                                                      | -0.017                          | 1.17     | 3/5       |
| E45D                 | 45       | -1.379   | -0.813                                   | -2.010                                                      | -0.065                          | 1.2      | 3/5       |
| E45G                 | 45       | -2.671   | -1.095                                   | -3.448                                                      | 0.305                           | 1.5      | 5/5       |
| E45K                 | 45       | -1.965   | -0.374                                   | -2.834                                                      | 0.090                           | 1.09     | 4/5       |
| E45Q                 | 45       | -1.209   | -0.352                                   | -2.503                                                      | -0.107                          | 0.17     | 3/5       |
| E45V                 | 45       | -1.067   | 0.917                                    | -1.945                                                      | -0.085                          | 0.18     | 3/5       |
| A49V                 | 49       | 0.012    | -0.764                                   | -0.529                                                      | 0.045                           | 0.74     | 3/5       |

|       |     |        |        |        |        |       |           |
|-------|-----|--------|--------|--------|--------|-------|-----------|
| R52G  | 52  | -0.478 | -1.282 | -0.438 | 0.117  | 0.64  | 5/5       |
| V53I  | 53  | -0.164 | 0.120  | 0.064  | -0.126 | 0.23  | uncertain |
| N57K  | 57  | -0.057 | -0.014 | 0.449  | 0.016  | 0.08  | 3/5       |
| P72H  | 72  | 0.593  | 0.197  | 0.261  | 0.144  | 0     | uncertain |
| I86F  | 86  | -1.095 | -1.342 | -1.445 | -0.071 | 1.5   | 4/5       |
| L89R  | 89  | -0.657 | -2.109 | -1.687 | 0.060  | 1.27  | 5/5       |
| R98L  | 98  | -0.158 | 0.081  | 0.439  | -0.434 | -0.27 | 3/5       |
| G110E | 110 | -1.177 | 0.233  | -1.296 | -0.315 | 0.15  | 3/5       |
| E116G | 116 | -1.174 | -0.949 | -1.148 | 0.035  | 1.07  | 4/5       |
| W126G | 126 | -1.605 | -2.260 | -2.518 | 0.231  | 3.27  | 5/5       |
| K135I | 135 | 0.831  | 0.343  | 0.214  | 0.021  | 0.22  | uncertain |
| R137W | 137 | 0.112  | -0.858 | -0.302 | -0.027 | 0.04  | uncertain |
| H139D | 139 | -0.555 | -1.117 | -0.610 | 0.171  | 1.61  | 5/5       |
| H139N | 139 | -0.632 | -0.910 | -0.665 | 0.151  | 0.73  | 4/5       |
| H139P | 139 | -0.946 | -1.021 | -0.510 | 0.117  | 1.87  | 5/5       |
| H139R | 139 | 0.100  | -0.671 | -1.046 | 0.057  | 1.34  | 3/5       |
| H139Y | 139 | 0.673  | -0.206 | 0.398  | -0.087 | 0.81  | 3/5       |
| Q141R | 141 | 0.545  | -0.843 | 0.197  | 0.051  | 0.5   | uncertain |
| F144C | 144 | -1.085 | -2.610 | -1.631 | -0.276 | 2     | 4/5       |
| F144V | 144 | -0.390 | -2.288 | -1.302 | -0.188 | 1.79  | 4/5       |
| S145R | 145 | 1.155  | -0.698 | -0.953 | -0.292 | 0.78  | uncertain |
| F146S | 146 | -2.484 | -2.881 | -3.060 | 0.434  | 3.47  | 5/5       |
| I147F | 147 | 0.421  | -0.843 | -1.297 | -0.132 | 0.97  | uncertain |
| T148P | 148 | -0.371 | -1.258 | -1.336 | 0.095  | 1.75  | 5/5       |
| L157W | 157 | -0.226 | -2.400 | -1.950 | 0.147  | 0.96  | 5/5       |
| D158E | 158 | 0.445  | -0.490 | -0.770 | 0.007  | 1.27  | 3/5       |
| D158V | 158 | 0.449  | 0.890  | 0.289  | -0.143 | 0.84  | 3/5       |
| D158Y | 158 | 0.409  | 0.368  | -0.297 | -0.123 | 0.44  | uncertain |
| S159I | 159 | 0.347  | -0.574 | 0.647  | -0.402 | 0.57  | 3/5       |
| S160F | 160 | 0.813  | 1.533  | -0.728 | -0.474 | 0.52  | 3/5       |
| G161C | 161 | 1.225  | -1.232 | -0.918 | -0.246 | 0.08  | 3/5       |

|       |     |        |        |        |        |       |           |
|-------|-----|--------|--------|--------|--------|-------|-----------|
| G161D | 161 | 0.340  | -1.029 | -1.210 | 0.042  | 0.91  | 4/5       |
| G161R | 161 | 0.188  | -0.787 | -0.828 | -0.174 | 0.42  | uncertain |
| G161S | 161 | 0.835  | -0.828 | -1.297 | -0.050 | 0.69  | uncertain |
| G161V | 161 | 1.624  | -1.189 | 0.503  | -0.260 | -0.14 | 4/5       |
| A163D | 163 | -1.659 | -2.216 | -2.192 | 0.111  | 1.88  | 5/5       |
| F164C | 164 | -1.583 | -2.566 | -1.852 | -0.004 | 1.87  | 4/5       |
| A165P | 165 | -0.373 | -2.000 | 0.374  | 0.142  | 3.26  | 4/5       |
| A165T | 165 | -0.585 | -0.877 | -0.375 | 0.001  | 1.63  | 4/5       |
| V167F | 167 | -0.153 | -1.986 | -1.646 | -0.199 | 1     | 4/5       |
| G168R | 168 | -0.353 | -0.229 | -1.032 | -0.464 | 0.23  | 3/5       |
| A169D | 169 | -1.134 | -2.112 | -1.830 | 0.114  | 3.12  | 5/5       |
| C170R | 170 | -1.165 | -2.059 | -0.676 | 0.046  | 1.81  | 5/5       |
| C170Y | 170 | -0.624 | -2.015 | -1.349 | -0.288 | 0.66  | 4/5       |
| L173P | 173 | -1.139 | -3.249 | -1.714 | 0.270  | 4.13  | 5/5       |
| R176Q | 176 | -0.151 | -0.479 | -0.211 | 0.012  | 0.12  | 5/5       |
| R176W | 176 | 0.107  | -0.492 | -0.211 | -0.060 | 0.39  | uncertain |
| D177V | 177 | -0.393 | 0.388  | 0.213  | -0.244 | 0.82  | uncertain |
| D177Y | 177 | 0.832  | 0.040  | -0.290 | -0.099 | 0.41  | uncertain |
| L180R | 180 | -0.873 | -1.923 | -2.176 | 0.284  | 2.93  | 5/5       |
| A181P | 181 | -0.001 | -1.874 | -0.611 | -0.055 | 2.13  | 4/5       |
| A181S | 181 | -1.064 | -1.044 | -1.765 | 0.047  | 0.83  | 5/5       |
| L182P | 182 | -0.656 | -3.218 | -1.644 | 0.354  | 3.06  | 5/5       |
| E184D | 184 | -1.248 | -1.165 | -1.502 | 0.164  | 0.68  | 5/5       |
| E184K | 184 | 0.212  | -0.914 | 0.044  | 0.044  | 0.63  | uncertain |
| E184Q | 184 | -0.196 | -0.815 | -0.108 | -0.085 | 0.57  | 3/5       |
| D185A | 185 | -0.219 | -0.448 | -0.005 | -0.108 | 1.04  | 3/5       |
| H186D | 186 | -1.195 | -0.969 | -1.905 | -0.142 | 2.83  | 3/5       |
| H186R | 186 | 0.251  | -0.260 | -1.078 | -0.077 | 1.77  | uncertain |
| W188C | 188 | 0.579  | -1.999 | -1.584 | -0.223 | 2.84  | 3/5       |
| W188R | 188 | 0.120  | -1.935 | -2.092 | 0.127  | 3.32  | 4/5       |
| W188S | 188 | -0.124 | -2.905 | -3.281 | 0.224  | 4.34  | 5/5       |

|       |     |        |        |        |        |       |           |
|-------|-----|--------|--------|--------|--------|-------|-----------|
| V189E | 189 | -2.454 | -2.586 | -3.201 | 0.664  | 5.03  | 5/5       |
| P193L | 193 | 0.804  | -0.576 | 0.173  | 0.030  | 0.7   | uncertain |
| N194S | 194 | 0.035  | -0.078 | 0.171  | -0.029 | 0.2   | 3/5       |
| Q197K | 197 | -0.498 | -0.275 | 0.207  | -0.228 | 0.36  | uncertain |
| T198I | 198 | 1.396  | -0.879 | 0.494  | -0.307 | 0.63  | 3/5       |
| E200G | 200 | -2.379 | -1.501 | -2.448 | -0.455 | 1.69  | 4/5       |
| V201G | 201 | -1.886 | -3.863 | -2.709 | 0.385  | 4.11  | 5/5       |
| T202I | 202 | 0.515  | -1.222 | 0.499  | 0.007  | 0.55  | 3/5       |
| H204D | 204 | -0.339 | -1.457 | -0.267 | 0.268  | 2.6   | 5/5       |
| V220F | 220 | 1.352  | -1.057 | -1.030 | -0.334 | 0.47  | 3/5       |
| V220M | 220 | 1.018  | -0.585 | -0.439 | -0.334 | 0.42  | uncertain |
| W225L | 225 | -1.442 | -1.893 | -2.342 | -0.063 | 2.43  | 4/5       |
| W225R | 225 | -0.550 | -2.118 | -2.009 | 0.218  | 3.03  | 5/5       |
| W225S | 225 | -2.883 | -2.906 | -3.035 | 0.191  | 4.31  | 5/5       |
| L228P | 228 | -1.734 | -2.876 | -2.633 | 0.541  | 3.32  | 5/5       |
| G230R | 230 | 0.225  | -0.597 | -0.838 | -0.063 | 0.91  | uncertain |
| S231P | 231 | -0.024 | -1.010 | -0.174 | 0.021  | 2.59  | 5/5       |
| R234H | 234 | -0.772 | -0.284 | -1.305 | 0.038  | 0.1   | 4/5       |
| R234L | 234 | -0.679 | 0.446  | 0.413  | -0.151 | -0.11 | uncertain |
| D236H | 236 | 0.653  | -0.229 | -0.734 | 0.058  | 0.48  | 3/5       |
| E240K | 240 | -1.482 | -0.661 | -2.236 | 0.163  | 0.75  | 4/5       |
| V245F | 245 | -0.761 | -2.393 | -1.424 | -0.214 | 1.11  | 4/5       |
| C246F | 246 | 1.205  | -1.811 | -0.911 | -0.277 | 0.69  | 3/5       |
| C246R | 246 | 0.063  | -1.832 | -0.544 | -0.132 | 0     | uncertain |
| C246Y | 246 | 1.266  | -1.643 | -0.944 | -0.326 | 0.41  | 3/5       |
| A247V | 247 | 0.741  | -1.034 | -0.282 | -0.279 | 1.04  | 3/5       |
| I252T | 252 | -0.420 | -2.064 | -0.649 | -0.074 | 0.98  | 4/5       |
| L254P | 254 | -0.431 | -0.791 | -0.067 | -0.067 | -1.1  | uncertain |
| S258L | 258 | 0.667  | -0.476 | -0.010 | -0.208 | 0.91  | uncertain |
| S258P | 258 | 0.623  | -1.422 | -0.439 | 0.092  | 0.61  | 4/5       |
| S258W | 258 | 0.635  | -0.944 | -1.185 | -0.134 | 0.85  | uncertain |

|       |     |        |        |        |        |       |           |
|-------|-----|--------|--------|--------|--------|-------|-----------|
| E260K | 260 | 0.692  | -0.959 | 0.314  | -0.026 | 0.84  | uncertain |
| L261F | 261 | -1.010 | -1.250 | -1.804 | -0.072 | 0.55  | 4/5       |
| Q263H | 263 | 0.888  | -0.368 | -0.744 | -0.357 | 0.64  | uncertain |
| L264P | 264 | -1.684 | -3.611 | -2.125 | 0.503  | 4.32  | 5/5       |
| L264R | 264 | -1.912 | -2.045 | -2.249 | 0.049  | 2.02  | 5/5       |
| Q265P | 265 | -1.353 | -1.234 | -1.049 | 0.193  | 1.99  | 5/5       |
| Q265R | 265 | -0.070 | -0.741 | -0.935 | -0.051 | 0.78  | 3/5       |
| L269P | 269 | -2.134 | -3.509 | -2.459 | 0.646  | 4.37  | 5/5       |
| L272P | 272 | -1.605 | -3.531 | -2.427 | 0.457  | 4.22  | 5/5       |
| L278P | 278 | -0.804 | -3.164 | -1.572 | 0.176  | 3.02  | 5/5       |
| E279A | 279 | -0.082 | -0.127 | -0.540 | -0.102 | 0.39  | 3/5       |
| R280K | 280 | 0.329  | -0.296 | -0.766 | 0.080  | 0.62  | 3/5       |
| P282H | 282 | -0.504 | -0.626 | -1.750 | -0.236 | 1.64  | 3/5       |
| P282L | 282 | 1.587  | -0.515 | 0.716  | -0.345 | 1.07  | 3/5       |
| G286R | 286 | 0.473  | -0.517 | -1.125 | -0.475 | 0.02  | uncertain |
| A289E | 289 | -1.145 | -1.620 | -2.864 | -0.024 | 2.44  | 4/5       |
| A289P | 289 | -0.600 | -1.620 | -1.340 | 0.040  | 3.03  | 5/5       |
| A289Q | 289 | -1.399 | -1.405 | -1.896 | -0.134 | 1.77  | 4/5       |
| A289V | 289 | -1.239 | -1.557 | -0.541 | -0.238 | 0.65  | 4/5       |
| L291P | 291 | -1.218 | -3.224 | -2.165 | 0.077  | 3.07  | 5/5       |
| L294P | 294 | -0.300 | -2.048 | -0.273 | -0.392 | 0.79  | 4/5       |
| G310D | 310 | 0.473  | -0.896 | -2.323 | -0.135 | 1.3   | uncertain |
| G310R | 310 | 0.030  | -0.638 | -1.083 | -0.188 | 0.58  | uncertain |
| A314P | 314 | -1.050 | -1.725 | -1.387 | -0.103 | 1.36  | 4/5       |
| T316P | 316 | 0.586  | -0.743 | -0.375 | -0.015 | 0.42  | uncertain |
| R319P | 319 | -0.853 | -0.918 | -0.491 | -0.073 | 1.46  | 3/5       |
| D320Y | 320 | 1.177  | -0.134 | 0.308  | -0.137 | 0.06  | 3/5       |
| H322R | 322 | -0.386 | -0.708 | -1.954 | 0.137  | 1.68  | 4/5       |
| H322Y | 322 | 0.043  | -0.281 | -0.187 | 0.048  | 0.65  | 3/5       |
| P325L | 325 | 1.972  | -0.364 | 0.156  | -0.511 | -0.14 | 4/5       |
| P325R | 325 | 0.632  | -0.269 | -1.635 | -0.110 | 0.34  | uncertain |

|       |     |        |        |        |        |       |           |
|-------|-----|--------|--------|--------|--------|-------|-----------|
| A330P | 330 | -1.141 | -1.681 | -0.987 | 0.058  | 2.99  | 5/5       |
| R335P | 335 | -0.631 | -0.965 | -0.803 | -0.239 | 1.21  | 3/5       |
| A342D | 342 | -0.328 | -2.042 | -3.154 | 0.010  | 2.12  | 5/5       |
| A342P | 342 | -0.970 | -2.094 | -1.082 | -0.011 | 2.74  | 4/5       |
| L343P | 343 | -1.606 | -3.465 | -2.210 | 0.369  | 3.98  | 5/5       |
| A345T | 345 | -0.138 | -0.811 | -1.687 | -0.101 | 0.85  | 3/5       |
| W346R | 346 | -1.239 | -2.067 | -1.917 | 0.304  | 2.92  | 5/5       |
| A347P | 347 | -1.240 | -1.847 | -1.295 | 0.059  | 2.31  | 5/5       |
| T349R | 349 | -0.969 | -0.859 | -0.624 | -0.143 | 0.36  | 3/5       |
| I353N | 353 | -2.347 | -3.274 | -2.873 | 0.384  | 3.35  | 5/5       |
| D355V | 355 | -0.092 | 0.012  | 0.761  | -0.358 | 0.69  | uncertain |
| Y356N | 356 | -1.949 | -1.832 | -3.434 | 0.521  | 3.58  | 5/5       |
| Y358D | 358 | -2.741 | -2.417 | -3.286 | 0.354  | 3.02  | 5/5       |
| C359F | 359 | 0.615  | -1.461 | -1.241 | 0.013  | 1.41  | 4/5       |
| R360W | 360 | 0.092  | -0.928 | -0.165 | -0.343 | 0.05  | uncertain |
| D362H | 362 | 0.300  | 0.172  | -0.173 | 0.024  | 0.2   | 3/5       |
| E364K | 364 | 0.292  | -0.294 | -0.391 | -0.146 | 0.3   | uncertain |
| F369C | 369 | -0.569 | -2.873 | -1.028 | 0.045  | 1.52  | 5/5       |
| E371D | 371 | -0.925 | -0.203 | -1.108 | -0.374 | 0.47  | 3/5       |
| A373D | 373 | -0.060 | -2.006 | -2.051 | 0.270  | 2.68  | 5/5       |
| A373P | 373 | 0.146  | -1.943 | -0.574 | 0.295  | 2.99  | 4/5       |
| I377M | 377 | 0.185  | -1.152 | -0.530 | -0.185 | 1.01  | 3/5       |
| P378A | 378 | -1.312 | -0.981 | -1.285 | -0.228 | 0.82  | 3/5       |
| P378L | 378 | 0.298  | -0.523 | -0.021 | -0.448 | -0.07 | 3/5       |
| P378S | 378 | -0.793 | -1.288 | -2.239 | -0.170 | 0.34  | 4/5       |
| L380P | 380 | -2.272 | -3.071 | -2.234 | 0.392  | 4.27  | 5/5       |
| L381P | 381 | -1.367 | -3.206 | -1.973 | 0.307  | 3.75  | 5/5       |
| A390V | 390 | 0.235  | 0.455  | -0.231 | -0.226 | 0.05  | uncertain |
| P395R | 395 | 0.065  | 0.187  | 0.177  | -0.107 | 0.19  | 3/5       |
| F415L | 415 | -0.498 | -1.744 | -0.908 | -0.159 | 1.01  | 4/5       |
| A416P | 416 | 0.546  | -1.797 | -0.836 | -0.071 | 1.77  | 3/5       |

|       |     |        |        |        |        |       |           |
|-------|-----|--------|--------|--------|--------|-------|-----------|
| L418P | 418 | -0.761 | -3.446 | -1.640 | 0.635  | 3.62  | 5/5       |
| L418R | 418 | -2.053 | -2.030 | -2.015 | 0.186  | 1.85  | 5/5       |
| L419P | 419 | -0.830 | -3.518 | -1.480 | 0.665  | 3.96  | 5/5       |
| L419Q | 419 | -2.186 | -2.552 | -1.983 | 0.193  | 2.38  | 5/5       |
| R420P | 420 | -0.456 | -1.258 | -1.006 | -0.148 | 1.72  | 4/5       |
| D423H | 423 | -0.744 | -0.136 | -2.210 | -0.006 | 0.19  | 3/5       |
| D423N | 423 | -1.210 | -0.409 | -1.898 | -0.016 | 0.66  | 3/5       |
| G424V | 424 | 2.135  | -0.953 | -0.124 | -0.271 | -0.73 | 3/5       |
| I425N | 425 | -1.116 | -3.119 | -2.709 | 0.409  | 4.28  | 5/5       |
| C426Y | 426 | -0.315 | -2.048 | -1.524 | -0.272 | 0.56  | 4/5       |
| W428R | 428 | -0.555 | -1.810 | -1.810 | 0.267  | 2.82  | 5/5       |
| W428S | 428 | -1.599 | -2.799 | -2.578 | 0.419  | 3.51  | 5/5       |
| S432I | 432 | -0.333 | -1.004 | 0.310  | -0.148 | 0.83  | 3/5       |
| S432R | 432 | 0.406  | -0.402 | -0.943 | 0.015  | 0.75  | 3/5       |
| T434K | 434 | 0.046  | -0.584 | -0.334 | -0.139 | 1.22  | uncertain |
| W441C | 441 | -1.027 | -2.097 | -1.223 | 0.061  | 2.76  | 5/5       |
| W441R | 441 | -1.552 | -2.213 | -2.133 | 0.258  | 2.31  | 5/5       |
| W441S | 441 | -2.137 | -3.118 | -2.907 | 0.324  | 3.62  | 5/5       |
| S448Y | 448 | 0.481  | 0.093  | -0.181 | -0.375 | 0.51  | uncertain |
| L449P | 449 | -0.712 | -3.382 | -1.213 | 0.413  | 3.79  | 5/5       |
| F452L | 452 | -0.626 | -2.512 | -0.888 | -0.148 | 1.78  | 4/5       |
| F452S | 452 | -2.976 | -3.261 | -2.958 | 0.382  | 3.72  | 5/5       |
| R457W | 457 | 1.084  | -0.277 | -0.891 | -0.169 | 0.33  | uncertain |
| W476C | 476 | -0.047 | -0.576 | 0.456  | 0.785  | -0.27 | uncertain |
| K507M | 507 | 0.098  | 0.097  | -0.116 | 0.609  | -0.16 | uncertain |
| G508D | 508 | 0.755  | -0.010 | -0.379 | -0.215 | 0.4   | uncertain |
| Q513K | 513 | -0.156 | -0.049 | 0.139  | 0.356  | -0.18 | uncertain |
| R521G | 521 | 0.027  | -1.091 | -0.027 | 0.126  | 0.94  | 4/5       |
| G537C | 537 | -0.668 | 0.034  | -0.870 | -0.201 | -0.41 | uncertain |
| A540V | 540 | 0.580  | 0.100  | -0.379 | 0.082  | -0.11 | uncertain |
| P545S | 545 | -0.089 | 0.005  | -0.224 | -0.032 | 0.47  | 3/5       |

|       |     |        |        |        |        |       |           |
|-------|-----|--------|--------|--------|--------|-------|-----------|
| T546A | 546 | -0.567 | -0.071 | 0.270  | -0.077 | -0.06 | uncertain |
| S548L | 548 | 0.771  | -0.219 | 0.571  | -0.083 | -0.01 | 4/5       |
| P549S | 549 | -0.298 | -0.157 | -0.204 | -0.042 | 0.51  | 3/5       |
| V555L | 555 | 0.112  | -0.507 | -0.345 | -0.149 | 0.83  | uncertain |
| T557S | 557 | -0.529 | -0.871 | -1.059 | 0.045  | 1.24  | 4/5       |
| S560N | 560 | -0.189 | -0.438 | -1.229 | 0.190  | 1.45  | 4/5       |
| S560R | 560 | -0.566 | -0.259 | -0.757 | 0.117  | 2.32  | 4/5       |
| K562E | 562 | -0.931 | -1.292 | -1.185 | -0.402 | 0.51  | 4/5       |
| M563K | 563 | -1.167 | -1.763 | -1.219 | 0.186  | 2.37  | 5/5       |
| M566K | 566 | -1.233 | -1.812 | -1.300 | 0.162  | 2.73  | 5/5       |
| M566R | 566 | -0.873 | -1.401 | -1.201 | 0.042  | 2.49  | 5/5       |
| M566T | 566 | -0.988 | -2.018 | -2.169 | 0.097  | 2.22  | 5/5       |
| I580N | 580 | -2.079 | -3.198 | -2.848 | 0.209  | 3.16  | 5/5       |
| L584P | 584 | -1.202 | -3.363 | -2.321 | 0.314  | 2.44  | 5/5       |
| S588P | 588 | -0.274 | -0.721 | -0.139 | -0.131 | 1.19  | 3/5       |
