# Supplementary material for: Investigating the Effects of Amino Acid Variations in Human Menin
Source: Molecules. 2022 Mar 7;27(5):1747. doi: 10.3390/molecules27051747 (PMC8911756; doi:10.3390/molecules27051747)
Supplement: Supplementary file 1 [file molecules-27-01747-s001.zip]

Archive with 4 entries (4 files):
- Supplementary-Table-S4.pdf
- Supplementary-Table-S1.pdf
- Supplementary-Table-S2.pdf
- Supplementary-Table-S3.pdf
